# Supplementary material
Source: HighWire-hosted journal article supplement (https://oem.bmj.com/content/suppl/2003/04/22/60.3.165)
Supplement: 603165T1.pdf [file 603165T1.pdf]

**TABLE S1 Test participants and controls by Service or employer, rank or social class and, for the Services, whether or not on National Service**

| Service or Employer        | Rank                             | Test participants   |         |              |       | Controls            |         |              |       |
|----------------------------|----------------------------------|---------------------|---------|--------------|-------|---------------------|---------|--------------|-------|
|                            |                                  | National servicemen | Regular | Total number | %     | National servicemen | Regular | Total number | %     |
| RN <sup>a</sup>            | Officer                          | 54                  | 434     | 488          |       | 22                  | 559     | 581          |       |
|                            | Other ranks                      | 340                 | 5,477   | 5,817        |       | 261                 | 6,502   | 6,763        |       |
|                            | Total                            | 394                 | 5,911   | 6,305        | 29.5  | 283                 | 7,061   | 7,344        | 32.9  |
| Army                       | Officer                          | 24                  | 537     | 561          |       | 174                 | 488     | 662          |       |
|                            | Other ranks                      | 1,563               | 3,670   | 5,233        |       | 1,727               | 3,093   | 4,820        |       |
|                            | Total                            | 1,587               | 4,207   | 5,794        | 27.1  | 1,901               | 3,581   | 5,482        | 24.5  |
| RAF                        | Officer                          | 17                  | 1,594   | 1,611        |       | 43                  | 1,755   | 1,798        |       |
|                            | Other ranks                      | 404                 | 6,428   | 6,832        |       | 765                 | 6,139   | 6,904        |       |
|                            | Total                            | 421                 | 8,022   | 8,443        | 39.5  | 808                 | 7,894   | 8,702        | 39.0  |
| AWE <sup>b</sup>           | Social class 1                   | 0                   | 380     | 380          |       | 0                   | 361     | 361          |       |
|                            | Other social classes             | 0                   | 435     | 435          |       | 0                   | 444     | 444          |       |
|                            | Total                            | 0                   | 815     | 815          | 3.8   | 0                   | 805     | 805          | 3.6   |
| All Services and employers | Total officers/social class 1    | 95                  | 2,945   | 3,040        | 14.2  | 239                 | 3,163   | 3,402        | 15.2  |
|                            | Total Other ranks/social classes | 2,307               | 16,010  | 18,317       | 85.8  | 2,753               | 16,178  | 18,931       | 84.8  |
|                            | Total                            | 2,402               | 18,955  | 21,357       | 100.0 | 2,992               | 19,341  | 22,333       | 100.0 |

*Notes*

- (a) RN includes members of the RM, RNVR and NAAFI.  
(b) AWE includes a few employees of AERE Harwell.
