# Supplementary material
Source: HighWire-hosted journal article supplement (https://oem.bmj.com/content/suppl/2003/04/22/60.3.165)
Supplement: 603165T2NEW.pdf [file 603165T2NEW.pdf]

**TABLE S2 Observed deaths (Obs) and standardised mortality ratios (SMR) among test participants and controls by time since start of first test participation and for broad causes of death, plus leukaemia and multiple myeloma**

| Cause of death          |     | Test participants                           |     |       |       |       |     |                                | Controls                          |     |       |       |       |     |                                |
|-------------------------|-----|---------------------------------------------|-----|-------|-------|-------|-----|--------------------------------|-----------------------------------|-----|-------|-------|-------|-----|--------------------------------|
|                         |     | Time since first test participation (years) |     |       |       |       |     |                                | Time since entry to study (years) |     |       |       |       |     |                                |
|                         |     | Whole period                                | <10 | 10-19 | 20-29 | 30-39 | 40+ | P value for trend <sup>a</sup> | Whole period                      | <10 | 10-19 | 20-29 | 30-39 | 40+ | P value for trend <sup>a</sup> |
| All neoplasms           | Obs | <b>1546</b>                                 | 53  | 159   | 363   | 821   | 150 | <0.001                         | <b>1645</b>                       | 63  | 195   | 459   | 732   | 196 | <0.001                         |
|                         | SMR | <b>93</b>                                   | 72  | 85    | 81    | 102   | 99  |                                | <b>92</b>                         | 69  | 82    | 90    | 95    | 107 |                                |
| Leukaemia               | Obs | <b>45</b>                                   | 5   | 9     | 11    | 15    | 5   | 0.82                           | <b>33</b>                         | 2   | 3     | 6     | 14    | 8   | 0.0053                         |
|                         | SMR | <b>98</b>                                   | 91  | 131   | 93    | 81    | 144 |                                | <b>68</b>                         | 33  | 37    | 47    | 80    | 190 |                                |
| Leukaemia excluding CLL | Obs | <b>40</b>                                   | 5   | 8     | 10    | 12    | 5   | 0.92                           | <b>23</b>                         | 2   | 3     | 5     | 8     | 5   | 0.071                          |
|                         | SMR | <b>106</b>                                  | 95  | 129   | 103   | 86    | 198 |                                | <b>58</b>                         | 35  | 42    | 48    | 61    | 164 |                                |
| Multiple myeloma        | Obs | <b>22</b>                                   | 1   | 4     | 3     | 8     | 6   | 1.00                           | <b>18</b>                         | 0   | 1     | 3     | 11    | 3   | 0.053                          |
|                         | SMR | <b>96</b>                                   | 204 | 211   | 50    | 65    | 252 |                                | <b>73</b>                         | 0   | 38    | 43    | 95    | 105 |                                |
| Other diseases          | Obs | <b>2769</b>                                 | 97  | 318   | 779   | 1330  | 245 | <0.001                         | <b>2961</b>                       | 122 | 403   | 881   | 1281  | 274 | <0.001                         |
|                         | SMR | <b>80</b>                                   | 54  | 70    | 79    | 86    | 82  |                                | <b>79</b>                         | 54  | 72    | 81    | 86    | 75  |                                |
| Accidents and violence  | Obs | <b>436</b>                                  | 148 | 94    | 106   | 77    | 11  | 0.27                           | <b>417</b>                        | 161 | 87    | 94    | 65    | 10  | 0.025                          |
|                         | SMR | <b>121</b>                                  | 135 | 109   | 122   | 113   | 138 |                                | <b>116</b>                        | 146 | 94    | 109   | 106   | 106 |                                |
| Unknown                 | Obs | <b>106</b>                                  | 5   | 21    | 32    | 44    | 4   |                                | <b>139</b>                        | 7   | 21    | 43    | 57    | 11  |                                |
| All causes              | Obs | <b>4857</b>                                 | 303 | 592   | 1280  | 2272  | 410 | <0.001                         | <b>5162</b>                       | 353 | 706   | 1477  | 2135  | 491 | 0.0079                         |
|                         | SMR | <b>89</b>                                   | 84  | 81    | 84    | 94    | 90  |                                | <b>88</b>                         | 83  | 80    | 88    | 92    | 88  |                                |

Note

(a) Two-sided test.
