# Supplementary material
Source: HighWire-hosted journal article supplement (https://oem.bmj.com/content/suppl/2003/04/22/60.3.165)
Supplement: 603165T5.pdf [file 603165T5.pdf]

**TABLE S5** Numbers of incident cancers among test participants and controls, and RRs of incident cancer in test participants compared with controls. For leukaemia the whole follow-up period and the period 2-25 years after start of the first test participation are considered. For other neoplasms the period more than 10 years after start of first test participation is considered

| Type of cancer                                               | Test participants at a major operation (15,634 men) |                   | Test participants in groups identified by MoD as liable to exposure to radiation <sup>a</sup> (759 men) (Group A) |                     | Test participants employed by AWE or directly involved in the minor trials at Maralinga <sup>b</sup> (1,041 men) (Group B) |                    | Test participants in Groups A and B, plus other men with a recorded dose greater than zero (2,649 men) |                    | Other test participants (5,164 men) |                    | All test participants (21,357 men) |                   |
|--------------------------------------------------------------|-----------------------------------------------------|-------------------|-------------------------------------------------------------------------------------------------------------------|---------------------|----------------------------------------------------------------------------------------------------------------------------|--------------------|--------------------------------------------------------------------------------------------------------|--------------------|-------------------------------------|--------------------|------------------------------------|-------------------|
|                                                              | Observed cases                                      | RR (90% CI)       | Observed cases                                                                                                    | RR (90% CI)         | Observed cases                                                                                                             | RR (90% CI)        | Observed cases                                                                                         | RR (90% CI)        | Observed cases                      | RR (90% CI)        | Observed cases                     | RR (90% CI)       |
| Leukaemia:                                                   |                                                     |                   |                                                                                                                   |                     |                                                                                                                            |                    |                                                                                                        |                    |                                     |                    |                                    |                   |
| Whole follow-up period                                       | 51                                                  | 1.32 (0.93, 1.86) | 2                                                                                                                 | 0.98 (0.19, 3.78)   | 7                                                                                                                          | 1.21 (0.42, 3.57)  | 10                                                                                                     | 1.00 (0.48, 2.07)  | 15                                  | 1.59 (0.92, 2.71)  | 67                                 | 1.33 (0.97, 1.84) |
| 2-25 years                                                   | 18                                                  | 2.89 (1.38, 6.15) | 2                                                                                                                 | 10.37 (1.84, 44.86) | 2                                                                                                                          | 7.55 (0.25, 2.81)  | 4                                                                                                      | 3.83 (0.93, 13.59) | 10                                  | 4.50 (1.91, 10.64) | 29                                 | 3.17 (1.63, 6.31) |
| Leukaemia excl. CLL:                                         |                                                     |                   |                                                                                                                   |                     |                                                                                                                            |                    |                                                                                                        |                    |                                     |                    |                                    |                   |
| Whole follow-up period                                       | 37                                                  | 1.36 (0.90, 2.07) | 1                                                                                                                 | 0.57 (0.03, 3.58)   | 4                                                                                                                          | 0.88 (0.23, 3.37)  | 6                                                                                                      | 0.80 (0.30, 2.01)  | 11                                  | 1.79 (0.93, 3.39)  | 49                                 | 1.41 (0.96, 2.09) |
| 2-25 years                                                   | 13                                                  | 3.00 (1.19, 7.86) | 1                                                                                                                 | 5.66 (0.33, 38.91)  | 1                                                                                                                          | 4.97 (0.04, 342.2) | 2                                                                                                      | 2.79 (0.29, 16.12) | 9                                   | 7.89 (2.85, 22.43) | 23                                 | 3.97 (1.73, 9.61) |
| Multiple Myeloma: 10+ years                                  | 24                                                  | 0.99 (0.62, 1.59) | 2                                                                                                                 | 1.10 (0.19, 4.77)   | 3                                                                                                                          | 1.17 (0.23, 6.15)  | 7                                                                                                      | 1.32 (0.54, 3.14)  | 9                                   | 1.19 (0.58, 2.38)  | 34                                 | 1.07 (0.70, 1.64) |
| Multiple Myeloma (wider definition) <sup>c</sup> : 10+ years | 25                                                  | 1.04 (0.65, 1.65) | 2                                                                                                                 | 1.10 (0.19, 4.77)   | 3                                                                                                                          | 1.17 (0.23, 6.15)  | 7                                                                                                      | 1.32 (0.54, 3.14)  | 9                                   | 1.19 (0.58, 2.38)  | 35                                 | 1.11 (0.72, 1.69) |
| All neoplasms except Leukaemia and Multiple Myeloma: 10+ yrs | 1928                                                | 0.98 (0.93, 1.03) | 100                                                                                                               | 0.83 (0.69, 1.00)   | 171                                                                                                                        | 1.21 (1.01, 1.46)  | 381                                                                                                    | 1.01 (0.91, 1.11)  | 537                                 | 0.95 (0.88, 1.03)  | 2545                               | 0.98 (0.94, 1.03) |

Notes

- (a) Members of the Buffalo Indoctrinee Force, RAF aircrews involved in sampling the radioactive clouds of the explosions; the RAF active handling flights, who decontaminated aircraft used in cloud sampling; members of the crew of HMS Diana, who sailed through the fallout plume in Operation Mosaic; and the Target Response Group at Operation Buffalo<sup>7</sup>.
- (b) Those in whom undocumented inhalation or ingestion of radionuclides, if any, is most likely to have occurred.
- (c) ICD 9<sup>th</sup> revision codes 203.0, 203.1, 238.6 and 273.1.
